# Supplementary material for: Evidence for adaptation of porcine Toll-like receptors
Source: PubMed Central journal article supplement (PMC4759233; doi:10.1007/s00251-015-0892-8), 2015-12-23

Title: Evidence for adaptation of porcine Toll-like receptors

Journal name: Immunogenetics

Author names: Kwame A. Darfour-Oduro<sup>1</sup>, Hendrik-Jan Megens<sup>2</sup>, Alfred Roca<sup>1</sup>, Martien A. M. Groenen<sup>2</sup> and Lawrence B. Schook<sup>1</sup>

<sup>1</sup>Department of Animal Sciences, University of Illinois, Urbana-Champaign, Illinois 61801, USA

<sup>2</sup>Animal Breeding and Genomics Centre, Wageningen University, Droeendaalsesteeg 1, Wageningen 6708 PB, The Netherlands

**Corresponding author: Lawrence B. Schook**

e-mail: schook@illinois.edu

Fig. S1

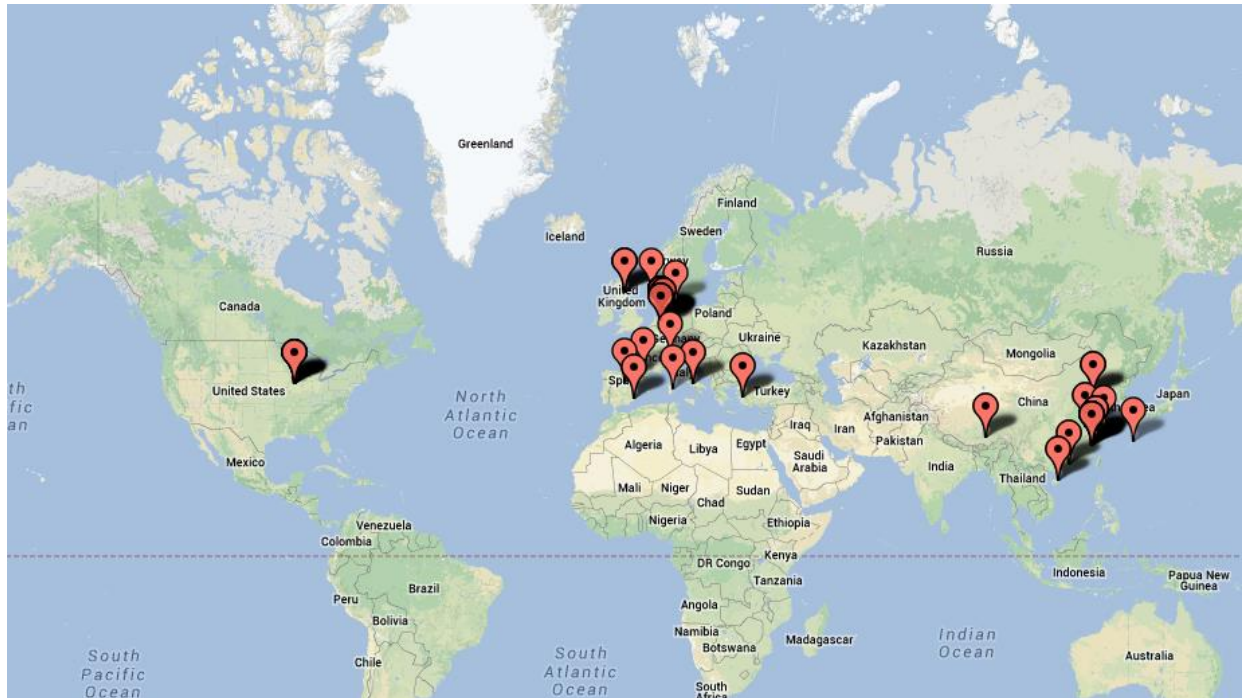

Supplement: 251_2015_892_MOESM5_ESM.pdf [file 251_2015_892_MOESM5_ESM.pdf]
